# Supplementary material for: Rapid and continuous fabrication of TiO2 nanoparticles encapsulated by polyimide fine particles using a multistep flow-system and their application
Source: Royal Society of Chemistry journal article supplement (doi:10.1039/d0ra09810h), 2021-01-01
Supplement: d0ra09810h1.pdf [file d0ra09810h1.pdf]

## Electronic Supplementary Information (ESI)

### Rapid and continuous fabrication of TiO<sub>2</sub> nanoparticles capsulated by polyimide fine particles using a multistep flow-system and its application

Takayui Ishizaka,\*<sup>a</sup> Maya Chatterjee<sup>a</sup> and H. Kawanami\*<sup>b</sup>

<sup>a</sup> Research Institute for Chemical Process Technology, National Institute of Advanced Science and Technology (AIST), 4-2-1, Nigatake, Miyagino-ku, Sendai, Miyagi 983-8551, Japan

<sup>b</sup> Interdisciplinary Research Center for Catalytic Chemistry, National Institute of Advanced Industrial Science and Technology (AIST), Central 5, 1-1-1 Higashi, Tsukuba, Ibaraki 305-8565 Japan.

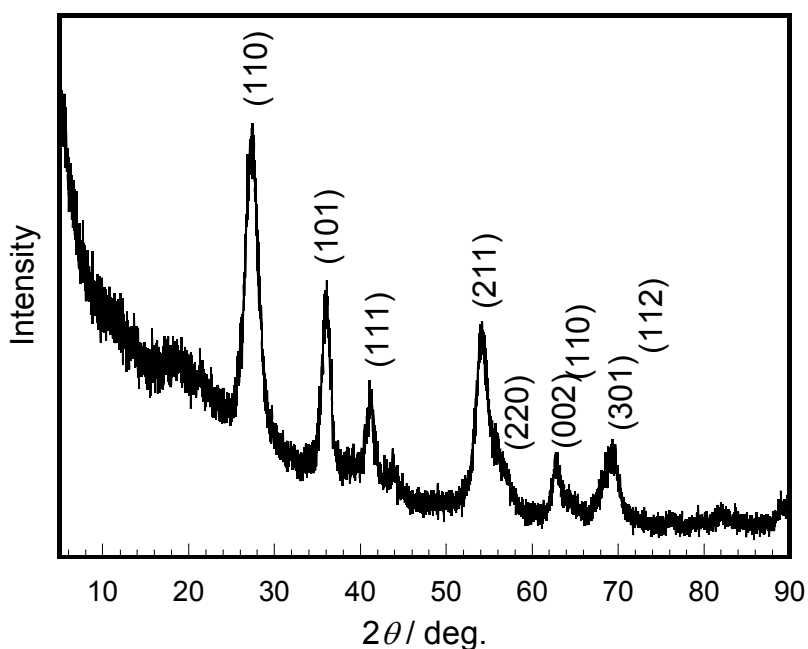

Fig. S1 XRD pattern of PI FPs/TiO<sub>2</sub> NPs powder. All peaks were assigned to the rutile type crystal. An average particle size of TiO<sub>2</sub> NPs was determined as 5.6 nm by

$$d = \frac{K\lambda}{B \cos \theta_B} \quad (1)$$

Scherrer's equation as followed:

Where  $d$  is the average particle size,  $\lambda$  is the X-ray wavelength,  $B$  is the full width at half maximum intensity of diffraction peak,  $\theta$  is the diffraction angle and  $K$  is a constant related to crystalline shape.

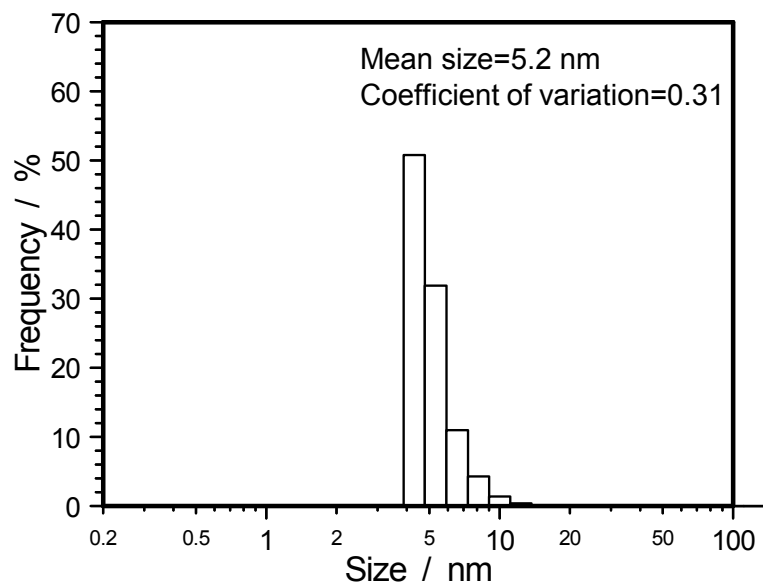

Fig. S2 Size distribution of  $\text{TiO}_2$  NPs dispersion liquid by dynamic light scattering (DLS) measurement.

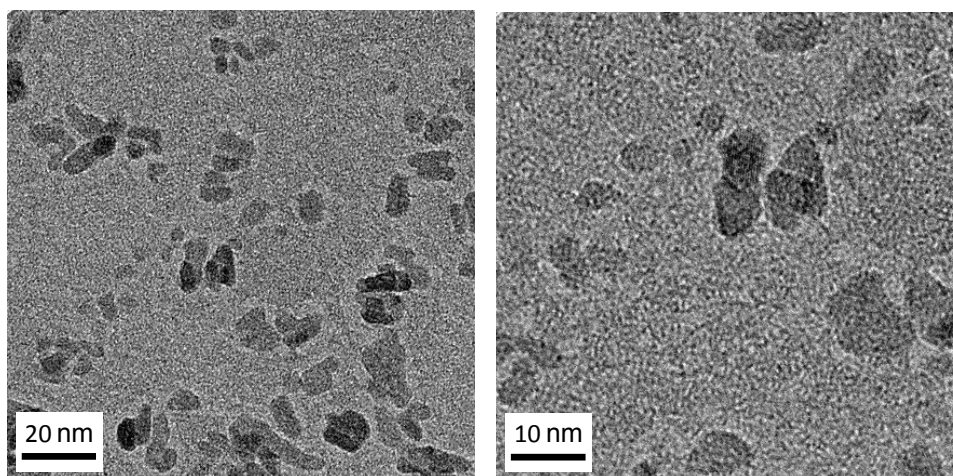

Fig. S3 TEM images of  $\text{TiO}_2$  NPs dispersion liquid used for fabrication of PI FPs/ $\text{TiO}_2$  NPs.

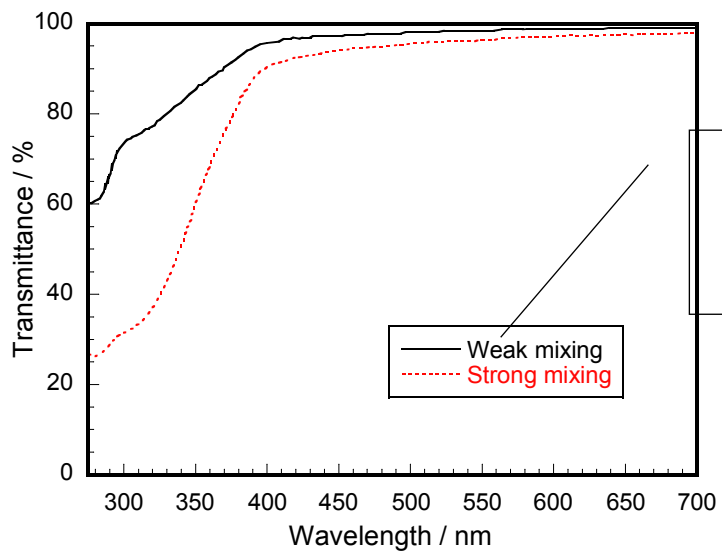

We revised “wake” to “weak” in this graph legend.

Please delete this text box finally.

Fig. S4 Transmittance spectrum of an application film of bare TiO<sub>2</sub> NPs-dispersed oils prepared with weak and strong mixing.
